# Supplementary material for: MicroRNA 196B regulates FAS-mediated apoptosis in colorectal cancer cells
Source: PubMed Central journal article supplement (PMC4413621; doi:10.18632/oncotarget.3066), 2014-12-26
Supplement: oncotarget-06-2843-s001.pdf [file oncotarget-06-2843-s001.pdf]

# MicroRNA 196B regulates FAS-mediated apoptosis in colorectal cancer cells

## Supplementary Material

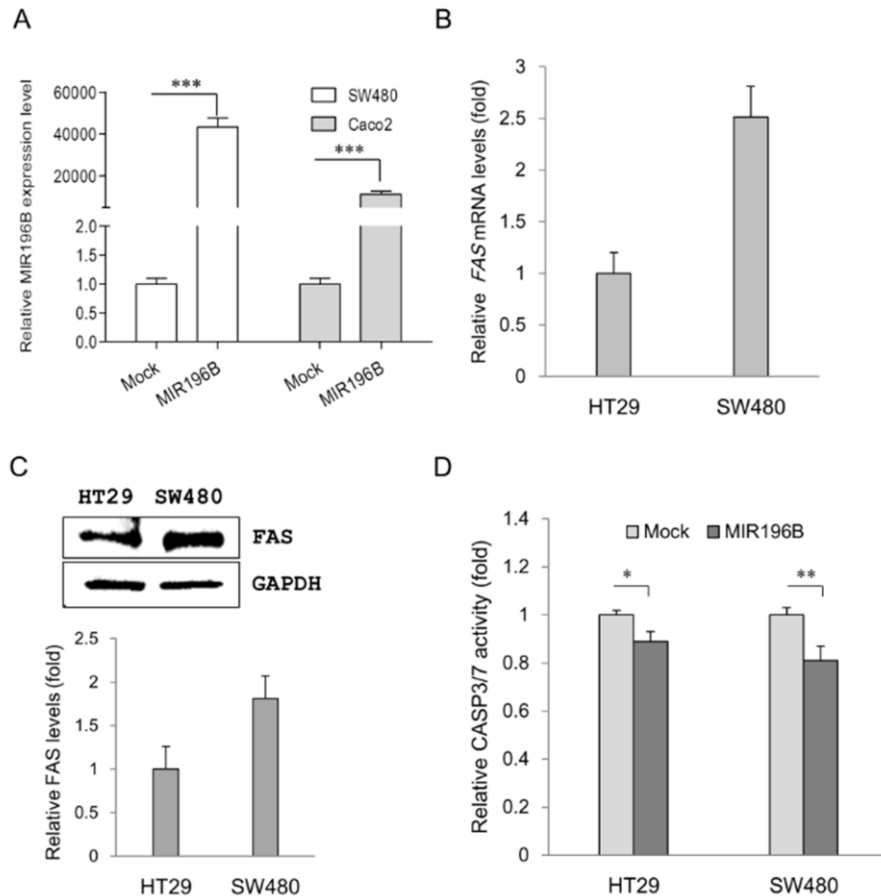

**Figure S1:** MIR196B transfection efficiency, FAS levels in colon cancer cell lines, and CASP3/7 levels by MIR196B

(A) SW480 or Caco2 cells were transfected with MIR196B. Cells were collected at 24 h to confirm the transfection efficiency. Data assessed from three independent experiments and the  $P$  values were calculated by  $t$ -test (\*\* $P < 0.001$ ). (B) qRT-PCR analysis and (C) western blot analysis in SW480 and HT29 cells. (D) MIR196B regulated caspase 3/7 activities in SW480 and HT29 cells. At 48 h after transfection of MIR196B, there were significantly decreased in caspase 3/7 activities compared to mock conditioned cells, respectively. The  $P$  values were calculated by  $t$ -test (\*  $P < 0.05$ ; \*\*  $P < 0.01$ ).

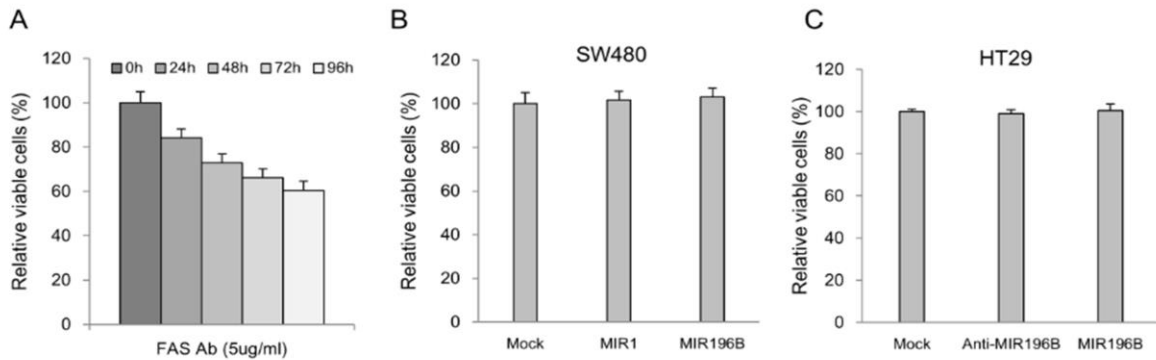

**Figure S2:** The effect of MIR196B on cell proliferation in human colon cancer cells

(A) SW480 cells ( $2 \times 10^4$  cells/ well) were cultured with FAS mAb (5  $\mu$ g/ml) for 96 h. Cells were collected at 24 h intervals for the MTT assay. SW480 cells (B) or HT-29 cells (C) were transfected with 50 nM MIR196B, anti-MIR196B, or MIR1 in a 48-well plate and grown for 72 h. The relative proliferation of cells transfected with each miRNA precursor was compared with the proliferation of mock-transfected control cells.

**Table S1:** MIR196B candidate target genes identified by mRNA microarray analysis

| Gene symbol | Accession      | Gene name                                                          | Chromosome location |
|-------------|----------------|--------------------------------------------------------------------|---------------------|
| AIF1L       | NM_031426.2    | allograft inflammatory factor 1-like                               | 9q34.13             |
| ANKDD1A     | NM_182703.3    | ankyrin repeat and death domain containing 1A                      | 15q22.31            |
| ANXA1       | NM_000700.1    | annexin A1                                                         | 9q21.13             |
| APEX2       | NM_014481.2    | APEX nuclease 2                                                    | Xp11.21             |
| ATP6V0B     | NM_004047.3    | ATPase, H <sup>+</sup> transporting, lysosomal 21kDa, V0 subunit b | 1p32.3              |
| B3GALT6     | NM_080605.3    | UDP-Gal:betaGal beta 1,3-galactosyltransferase polypeptide 6       | 1p36.33             |
| BTG3        | NM_006806.3    | BTG family, member 3                                               | 21q21.1             |
| C14orf109   | NM_015676.1    | transmembrane protein 251                                          | 14q32.12            |
| C7orf23     | NM_024315.2    | transmembrane protein 243, mitochondrial                           | 7q21.12             |
| C7orf55     | NM_197964.3    | chromosome 7 open reading frame 55                                 | 7q34                |
| C7orf59     | NM_001008395.2 | late endosomal/lysosomal adaptor, MAPK and MTOR activator 4        | 7q22.1              |
| CCDC72      | NM_015933.3    | translation machinery associated 7 homolog                         | 3p21.31             |
| CCND3       | NM_001760.2    | cyclin D3                                                          | 6p21                |
| CTSZ        | NM_001336.2    | cathepsin Z                                                        | 20q13.32            |
| DDX26B      | NM_182540.3    | DEAD/H (Asp-Glu-Ala-Asp/His) box polypeptide 26B                   | Xq26.3              |
| DIRAS2      | NM_017594.3    | DIRAS family, GTP-binding RAS-like 2                               | 9q22.2              |
| DLX1        | NM_001038493.1 | distal-less homeobox 1                                             | 2q32                |
| EEF1A1      | NM_001402.5    | eukaryotic translation elongation factor 1 alpha 1                 | 6q14.1              |
| FAS         | NM_152877.1    | cell surface death receptor                                        | 10q24.1             |
| GLRX        | NM_002064.1    | glutaredoxin (thioltransferase)                                    | 5q14                |
| GLTP        | NM_016433.3    | glycolipid transfer protein                                        | 12q24.11            |
| H3F3B       | NM_005324.3    | H3 histone, family 3B                                              | 17q25.1             |

|              |                |                                                                |          |
|--------------|----------------|----------------------------------------------------------------|----------|
| HADH         | NM_005327.2    | hydroxyacyl-CoA dehydrogenase                                  | 4q22-q26 |
| HAND1        | NM_004821.1    | heart and neural crest derivatives expressed 1                 | 5q33     |
| HBXIP        | NM_006402.2    | late endosomal adaptor, MAPK and MTOR activator 5              | 1p13.3   |
| HNRPDL       | NR_003249.1    | heterogeneous nuclear ribonucleoprotein D-like                 | 4q21.22  |
| HOXA5        | NM_019102.2    | homeobox A5                                                    | 7p15.2   |
| HOXA9        | NM_152739.3    | homeobox A9                                                    | 7p15.2   |
| HOXB6        | NM_018952.4    | homeobox B6                                                    | 17q21.3  |
| HOXB7        | NM_004502.3    | homeobox B7                                                    | 17q21.3  |
| HOXC8        | NM_022658.3    | homeobox C8                                                    | 12q13.3  |
| HSD17B10     | NM_004493.2    | hydroxysteroid (17-beta) dehydrogenase 10                      | Xp11.2   |
| IFI6         | NM_022873.2    | interferon, alpha-inducible protein 6                          | 1p35     |
| KCNIP3       | NM_013434.4    | Kv channel interacting protein 3, calsenilin                   | 2q21.1   |
| LAGE3        | NM_006014.3    | L antigen family, member 3                                     | Xq28     |
| LOC100132805 | XM_001719188.1 | Homo sapiens similar to predicted protein                      | chr. 3   |
| LOC400455    | XR_018793.1    | Homo sapiens hypothetical LOC400455                            | chr. 15  |
| LOC645058    | XM_930423.1    | similar to hepatitis B virus x-interacting protein (LOC645058) | Chr. 1   |
| LRRC49       | NM_017691.2    | leucine rich repeat containing 49                              | 15q23    |
| MED10        | NM_032286.2    | mediator complex subunit 10                                    | 5p15.31  |
| MRPL39       | NM_017446.3    | mitochondrial ribosomal protein L39                            | 21q21.3  |
| MYBBP1A      | NM_014520.2    | MYB binding protein (P160) 1a                                  | 17p13.3  |
| NHP2         | NM_001034833.1 | NHP2 ribonucleoprotein                                         | 5q35.3   |
| NOTCH1       | NM_017617.3    | notch 1                                                        | 9q34.3   |
| NUDT22       | NM_032344.1    | nudix (nucleoside diphosphate linked moiety X)-type motif 22   | 11q13.1  |
| OSBPL8       | NM_001003712.1 | oxysterol binding protein-like 8                               | 12q14    |
| PABPC4       | NM_003819.2    | poly(A) binding protein, cytoplasmic 4                         | 1p34.2   |
| PDE6D        | NM_002601.2    | phosphodiesterase 6D, cGMP-specific, rod, delta                | 2q35-q36 |
| PHLDA2       | NM_003311.3    | pleckstrin homology-like domain, family A, member 2            | 11p15.4  |
| PPP1CB       | NM_206876.1    | protein phosphatase 1, catalytic subunit, beta isozyme         | 2p23     |
| PRKAG2       | NM_024429.1    | protein kinase, AMP-activated, gamma 2 non-catalytic subunit   | 7q36.1   |
| RASL11B      | NM_023940.2    | RAS-like, family 11, member B                                  | 4q12     |
| RBP1         | NM_002899.2    | retinol binding protein 1, cellular                            | 3q23     |
| RNASEH2A     | NM_006397.2    | ribonuclease H2, subunit A                                     | 19p13.2  |
| S100A3       | NM_002960.1    | S100 calcium binding protein A3                                | 1q21     |
| S100A4       | NM_019554.2    | S100 calcium binding protein A4                                | 1q21     |
| SCNN1A       | NM_001038.4    | sodium channel, non-voltage-gated 1 alpha subunit              | 12p13    |
| SERBP1       | NM_001018069.1 | SERPINE1 mRNA binding protein 1                                | 1p31     |
| SPRED1       | NM_152594.1    | sprouty-related, EVH1 domain containing 1                      | 15q14    |
| TGFB1I1      | NM_015927.3    | transforming growth factor beta 1 induced transcript 1         | 16p11.2  |
| TMEM2        | NM_013390.1    | transmembrane protein 2                                        | 9q21.13  |
| TNNC1        | NM_003280.1    | troponin C type 1                                              | 3p21.1   |
| TPD52        | NM_005079.2    | tumor protein D52                                              | 8q21.13  |
| TSPO         | NM_000714.4    | translocator protein (18kDa)                                   | 22q13.31 |
| UFSP1        | NM_001015072.3 | UFM1-specific peptidase 1                                      | 7q22.1   |
| VSNL1        | NM_003385.4    | visinin-like 1                                                 | 2p24.3   |
| ZNF512       | NM_032434.2    | zinc finger protein 512                                        | 2p23     |

**Table S2:** Primer sequences used for qRT-PCR analysis and luciferase assays in this study

| Applications     | Primers | Primer sequence (5' → 3')      |
|------------------|---------|--------------------------------|
| qRT-PCR          | FAS-QF1 | ATGGCCAATTCTGCCATAAG           |
|                  | FAS-QR1 | GACAAAGCCACCCCAAGTTA           |
| Luciferase assay | FAS-LF1 | CAGCTCGAGCTACCTCAAAGACCTTTGCAC |
|                  | FAS-LR1 | CAGCTCGAGTATTCCATGTTTGGGGGTGC  |
|                  | FAS-LF2 | CTGAGAAAGAAGTGAGCCAGTAAAA      |
|                  | FAS-LR2 | TTTTACTGGCTCACTTCTTTCTCAG      |
